# Supplementary material
Source: MDPI journal article supplement (https://www.mdpi.com/2073-4344/10/11/1228)
Supplement: s1 [file s1]

Supplementary material

## An escape from noble metals for generating urethanes via reductive carbonylation of nitroarenes over FeSe<sub>2</sub>/γ-Al<sub>2</sub>O<sub>3</sub>

Anh Vy Tran <sup>1</sup>, Thuy Tram Huynh Nguyen <sup>1</sup>, Thanh Tung Nguyen <sup>1</sup>, Jayeon Baek <sup>2</sup>, and Yong Jin Kim<sup>2,\*</sup>

<sup>1</sup> Department of Green Process and System Engineering, Korea University of Science and Technology (UST), 89 Yangdaegiro-gil, Ipjang-myeon, Cheonan 31056, Republic of Korea

<sup>2</sup> Green Chemistry & Material Group, Korea Institute of Industrial Technology, 89 Yangdaegiro-gil, Cheonan-si 31056, Republic of Korea

\* Correspondence: yjkim@kitech.re.kr (Y. J. Kim); Tel: (+82-41) 589-8469; fax: (+82-41) 589-8580

**Supplementary Materials:** The following are available online at [www.mdpi.com/xxx/s1](http://www.mdpi.com/xxx/s1), Figure S1: title, Table S1: title, Video S1: title.

### Contents:

1. Different types of 5 wt% FeSe<sub>2</sub>/support for the generation of MPC (Table. S1)
2. TON value of the reductive carbonylation reaction using FeSe<sub>2</sub>/γ-Al<sub>2</sub>O<sub>3</sub> as catalyst (Table. S2)
3. X-ray diffraction spectra (XRD) of standard Ferroselite FeSe<sub>2</sub> (Fig. S1)
4. X-ray diffraction spectra (XRD) of FeSe<sub>2</sub>/γ-Al<sub>2</sub>O<sub>3</sub> (Fig. S2)
5. EDX/EDS spectra of FeSe<sub>2</sub> and the atomic ratio calculation of Fe/Se (Fig. S3)
6. EDX/EDS spectra of FeSe<sub>2</sub>/γ-Al<sub>2</sub>O<sub>3</sub> (Fig. S4)
7. X-ray photoelectron spectroscopy (XPS) survey spectra of FeSe<sub>2</sub> (Fig. S5)
8. X-ray photoelectron spectroscopy (XPS) survey spectra of FeSe<sub>2</sub>/γ-Al<sub>2</sub>O<sub>3</sub> (Fig. S6)
9. X-ray photoelectron spectroscopy (XPS) spectra of FeSe<sub>2</sub> (Fig. S7)
10. X-ray photoelectron spectroscopy (XPS) of FeSe<sub>2</sub>/ γ Al<sub>2</sub>O<sub>3</sub> (Fig. S8)
11. High resolution TEM images of neat FeSe<sub>2</sub> and FeSe<sub>2</sub>/γ-Al<sub>2</sub>O<sub>3</sub> (Fig. S9)
12. Thermogravimetric analysis (TGA) of neat FeSe<sub>2</sub> (Fig. S10)
13. GC-MS of the filtrate obtained in the reductive carbonylation reaction using FeSe<sub>2</sub> as catalyst with molar ratio NB/FeSe<sub>2</sub> = 1 (Fig. S11)
14. GC-MS of the filtrate obtained in the reductive carbonylation reaction using FeSe<sub>2</sub> as catalyst with molar ratio NB/FeSe<sub>2</sub> = 1 (Fig. S12)

15.  $^1\text{H}$ -NMR spectra of MPC product obtained from the reductive carbonylation reaction (Fig. S13)
16.  $^{13}\text{C}$ -NMR spectra of MPC product obtained from the reductive carbonylation reaction ( Fig. S14)
17. GC-MS of Methyl (4-methoxyphenyl) carbamate (Fig. S15)
18. GC-MS of Methyl (4-methylphenyl) carbamate (Fig. S16)
19. GC-MS of Methyl (4-bromophenyl) carbamate (Fig. S17)
20. GC-MS of Methyl (4-acetylphenyl) carbamate (Fig. S18)
21. GC-MS of Dimethyltoluene-2,4-dicarbamate (Fig. S19)
22. GC-MS of Dimethyl 1,4-phenylenebiscarbamate (Fig. S20)
23. SEM images of fresh  $\text{FeSe}_2/\gamma\text{-Al}_2\text{O}_3$  catalyst, and spent  $\text{FeSe}_2/\gamma\text{-Al}_2\text{O}_3$  (Fig. S21)
24. X-ray diffraction spectra of (a) fresh catalyst  $\text{FeSe}_2$ , and (b) recovered  $\text{FeSe}_2$  (Fig. S22)
25. X-ray photoelectron spectroscopy (XPS) of the fresh and spent  $\text{FeSe}_2/\gamma\text{-Al}_2\text{O}_3$  (Fig. S23)

**Table S. 1** Different types of FeSe<sub>2</sub>/support for the formation of MPC<sup>a</sup>

| Entry | Catalyst                                                     | NB Conversion (%) | MPC Yield (%) | Selectivity (%) |
|-------|--------------------------------------------------------------|-------------------|---------------|-----------------|
| 1     | FeSe <sub>2</sub> / $\gamma$ -Al <sub>2</sub> O <sub>3</sub> | >99               | 98.9          | 98.9            |
| 2     | FeSe <sub>2</sub> / basic Al <sub>2</sub> O <sub>3</sub>     | >99               | 91.6          | 91.6            |
| 3     | FeSe <sub>2</sub> / $\alpha$ -Al <sub>2</sub> O <sub>3</sub> | 98.1              | 87.8          | 89.5            |
| 4     | FeSe <sub>2</sub> /AlPO <sub>4</sub>                         | 87.0              | 85.7          | 98.5            |
| 5     | FeSe <sub>2</sub> /Zeolite beta                              | >99               | 79.9          | 79.9            |
| 6     | FeSe <sub>2</sub> /Activated C                               | >99               | 75.9          | 75.9            |
| 7     | FeSe <sub>2</sub> /SiO <sub>2</sub>                          | 78.4              | 71.5          | 91.3            |
| 8     | FeSe <sub>2</sub> /CeO <sub>2</sub>                          | 78.2              | 65.5          | 83.7            |
| 9     | FeSe <sub>2</sub> /neutral Al <sub>2</sub> O <sub>3</sub>    | 71.6              | 64.6          | 90.3            |
| 10    | FeSe <sub>2</sub> /FA-PO <sub>4</sub>                        | 59.4              | 58.1          | 97.9            |
| 11    | FeSe <sub>2</sub> /acidic Al <sub>2</sub> O <sub>3</sub>     | 60.8              | 49.7          | 81.7            |
| 12    | FeSe <sub>2</sub> /Montmorillonite                           | 50.8              | 43.2          | 85.0            |

<sup>a</sup>NB (2.46 g, 20 mmol), 4~5 wt% FeSe<sub>2</sub>/support (1 g, [FeSe<sub>2</sub>]: 0.2338 mmol), molar ratio of NB/FeSe<sub>2</sub> = 85, MeOH (30 mL), T = 160 °C, P (CO) = 8.3 MPa, *t* = 4 h.

**Table S. 2** TON value of the reductive carbonylation reaction using FeSe<sub>2</sub>/γ-Al<sub>2</sub>O<sub>3</sub> as catalyst

| Entry          | Substrate       | gNB / gFeSe <sub>2</sub> | Molar ratio NB/FeSe <sub>2</sub> | TON (wt) | TON (mmol) |
|----------------|-----------------|--------------------------|----------------------------------|----------|------------|
| 1 <sup>a</sup> | NB              | 560                      | 1000                             | 221      | 384        |
| 2 <sup>b</sup> | NB:ANL<br>(1:1) | 560                      | 1000                             | 369      | 640        |

<sup>a</sup>Conditions: NB (7.2 g, 58.5 mmol), 5wt% FeSe<sub>2</sub>/γ-Al<sub>2</sub>O<sub>3</sub> (0.25 g, [FeSe<sub>2</sub>] = 0.0125 g, 0.0585 mmol), molar ratio of NB/FeSe<sub>2</sub>= 1000, MeOH = 30 mL, P = 8.3MPa of CO, T = 160 °C, t = 72 h.

<sup>b</sup> NB (7.2 g, 58.5 mmol), AN (5.45 g, 58.5 mmol), 5wt% FeSe<sub>2</sub>/γ-Al<sub>2</sub>O<sub>3</sub> (0.25 g, [FeSe<sub>2</sub>] = 0.0125 g, 0.0585 mmol), MeOH = 30 mL, P = 8.3MPa of CO, T = 160 °C, t = 72 h.

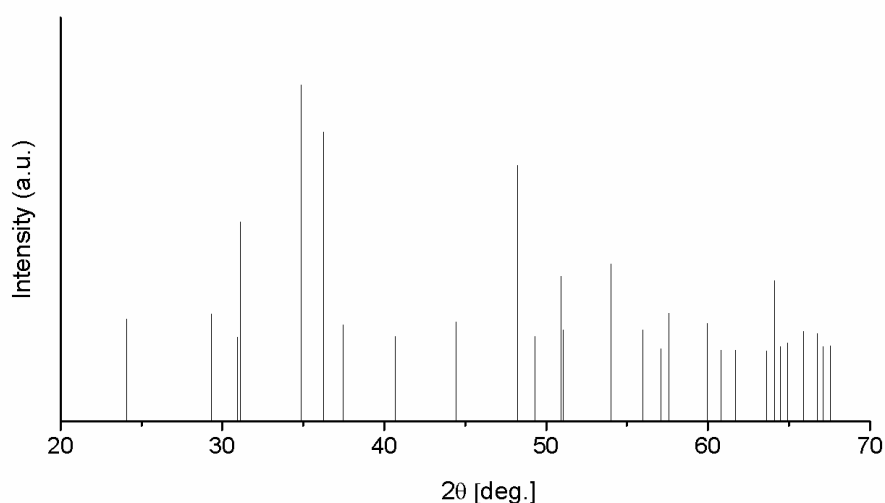

Ferroselite

\_database\_code\_ amcsd 0013331

SPACE GROUP: Pnnm

X-RAY WAVELENGTH: 1.541838

MAX. ABS. INTENSITY / VOLUME\*\*2: 89.95282294

**Figure S. 1** X-ray diffraction spectra (XRD) of standard Ferroselite FeSe<sub>2</sub>

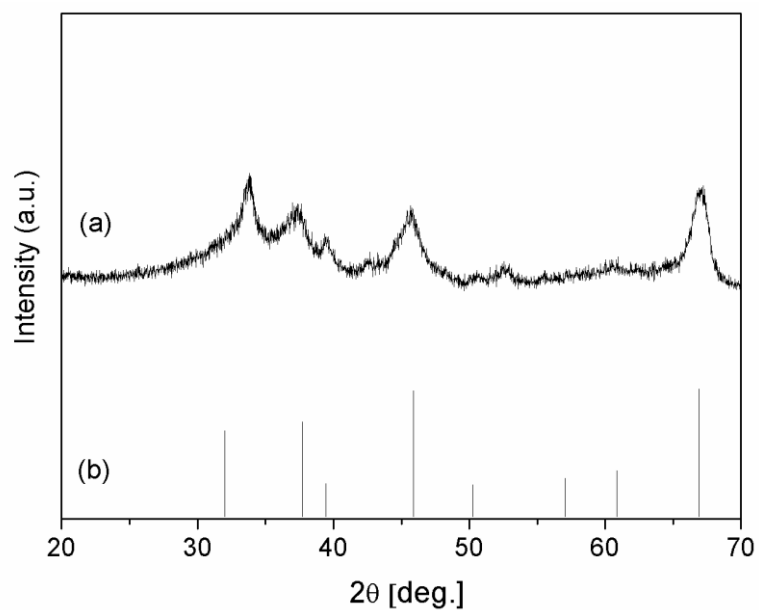

**Figure S. 2** (a) X-ray diffraction spectra (XRD) of  $\text{FeSe}_2/\gamma\text{-Al}_2\text{O}_3$ , (b) XRD standard spectra of  $\text{Al}_{2.144}\text{O}_{3.2}$  ( $\gamma$  - Aluminium oxide) PDF-number 79-1558-Cubic Fd-3m (227)

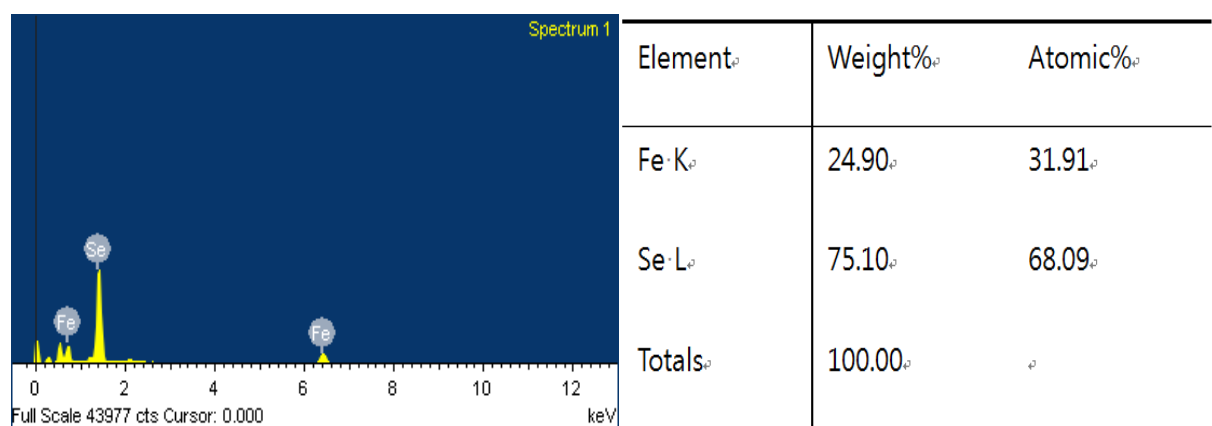

**Figure S. 3** EDX/EDS spectra of FeSe<sub>2</sub> and the atomic ratio calculation of Fe/Se.

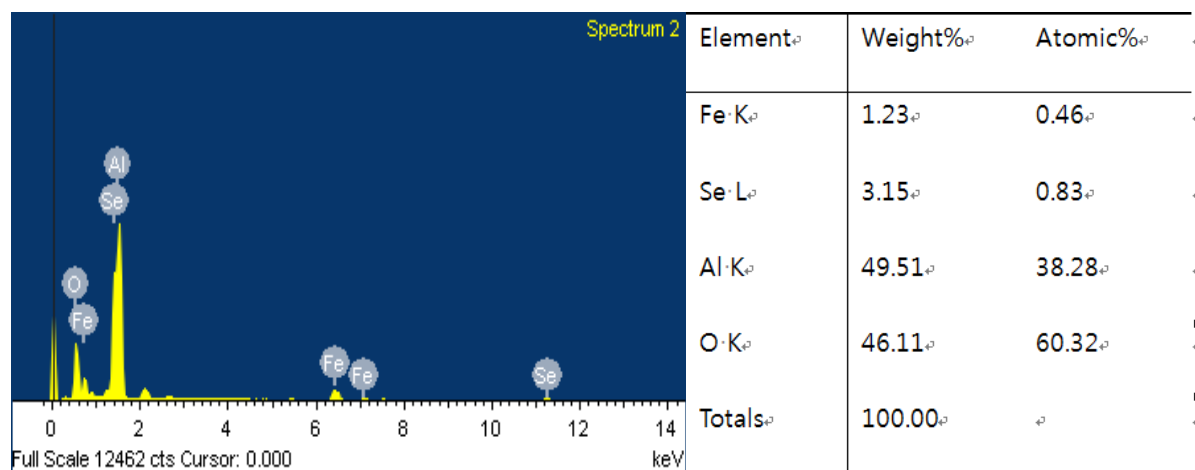

**Figure S. 4** EDX/EDS spectra of FeSe<sub>2</sub>/γ-Al<sub>2</sub>O<sub>3</sub> and the atomic ratio calculation.

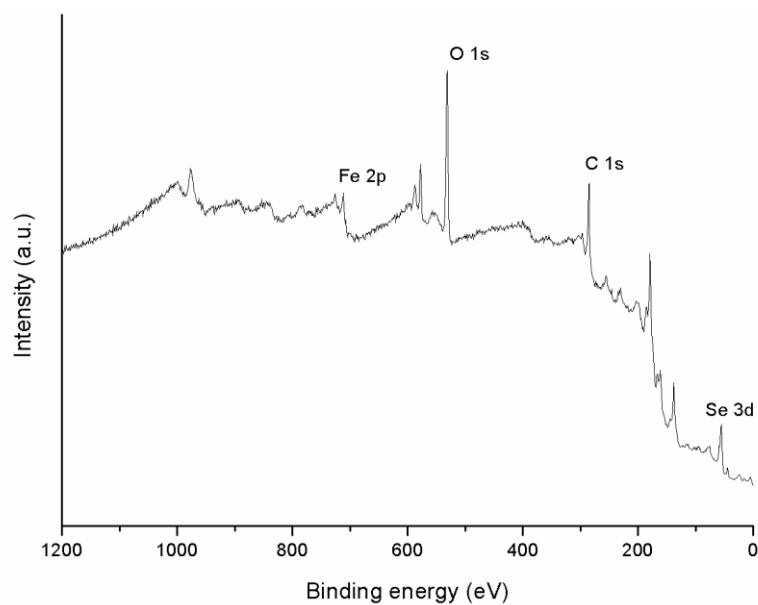

**Figure S. 5** X-ray photoelectron spectroscopy (XPS) survey spectra of FeSe<sub>2</sub>

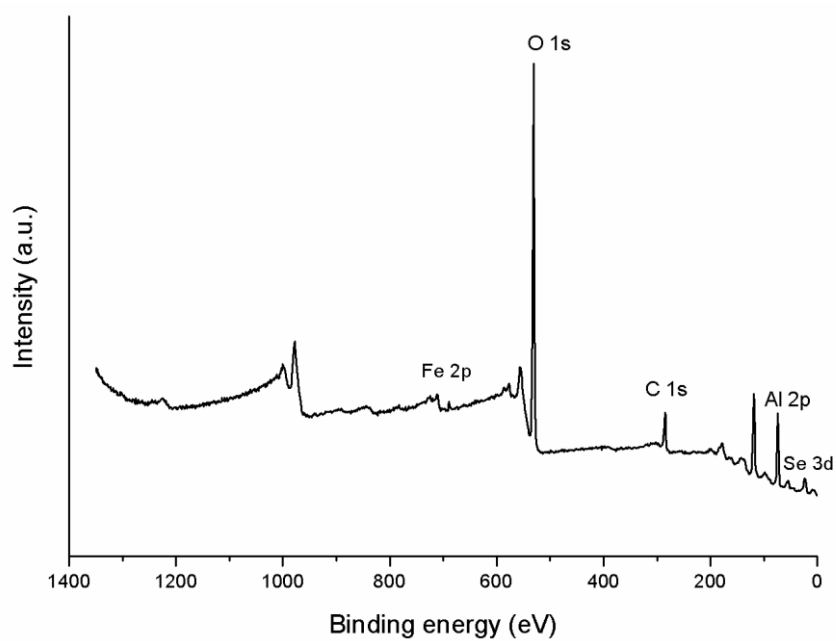

**Figure S. 6** X-ray photoelectron spectroscopy (XPS) survey spectra of FeSe<sub>2</sub>/γ-Al<sub>2</sub>O<sub>3</sub>

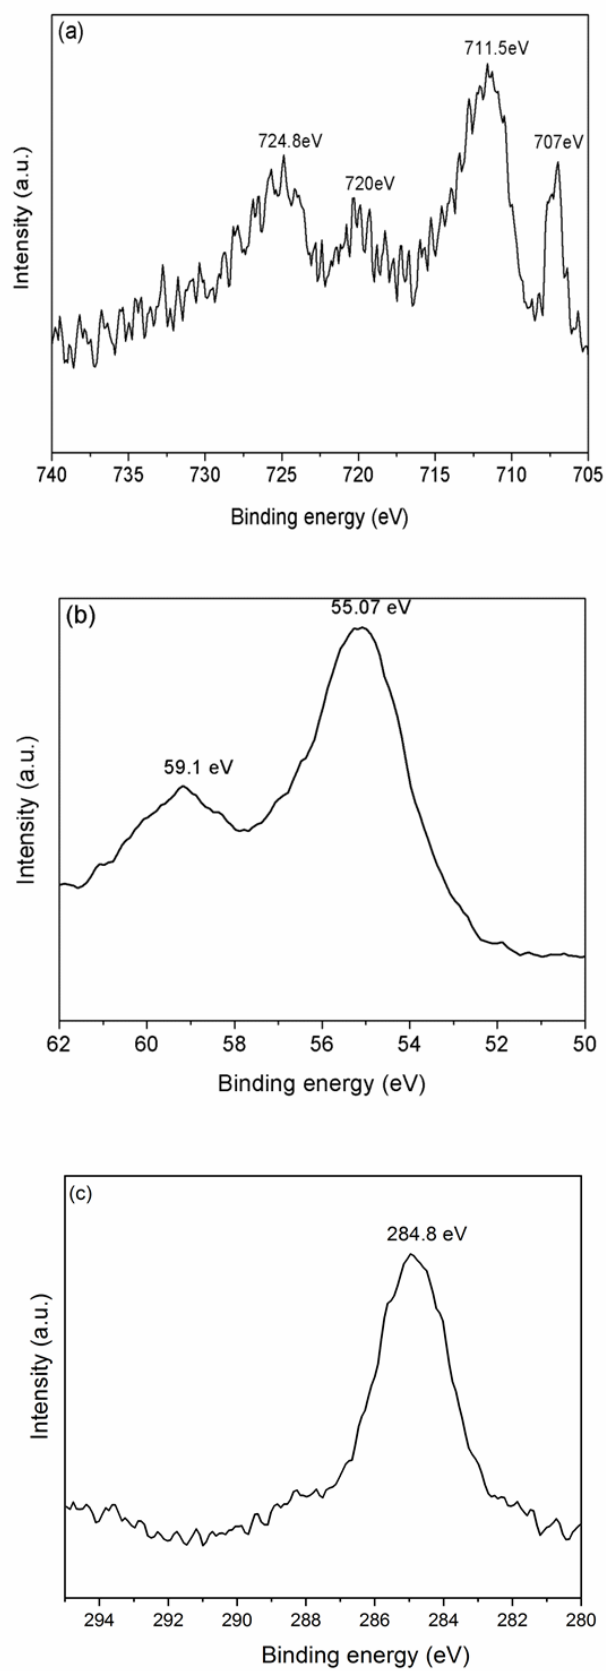

**Figure S. 7.** X-ray photoelectron spectroscopy (XPS) spectra of FeSe<sub>2</sub> in the region of (a) Fe 3p, (b) Se 3d, and (c) C 1s.



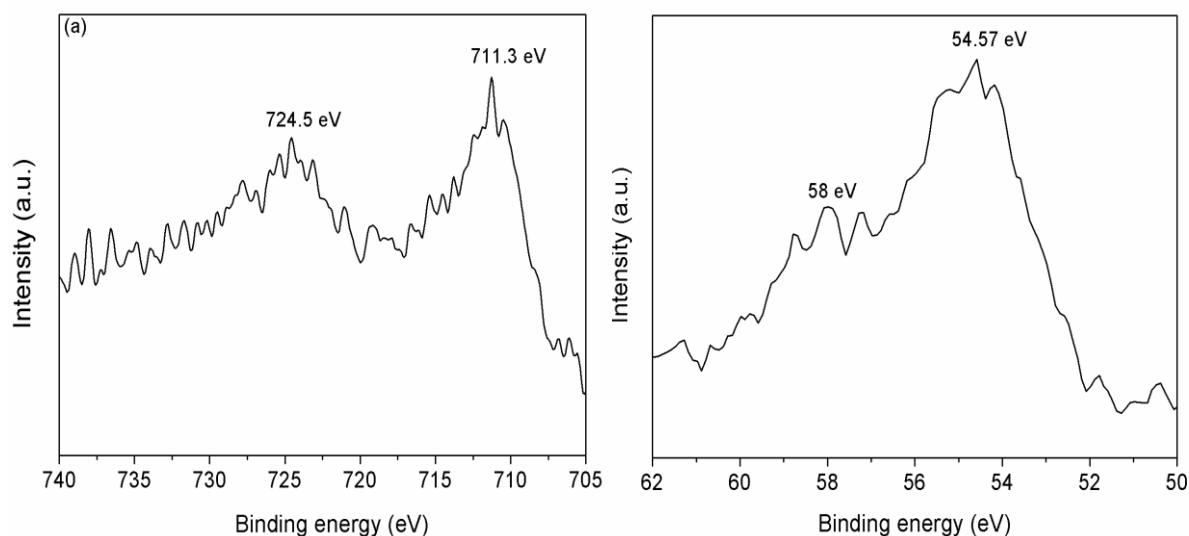

**Figure S. 8** X-ray photoelectron spectroscopy (XPS) of FeSe<sub>2</sub>/  $\gamma$ -Al<sub>2</sub>O<sub>3</sub> in the region of (a) Fe3p and (b) Se3d

XPS analysis was carried out to investigate the oxidation state of Fe and Se in FeSe<sub>2</sub>/ $\gamma$ -Al<sub>2</sub>O<sub>3</sub>. XPS survey spectra of FeSe<sub>2</sub>/ $\gamma$ -Al<sub>2</sub>O<sub>3</sub>, (see Fig.S-6) shows the photoelectron lines of Fe, Se, Al, and O. In Fig S.7a, two peaks of Fe 2p<sub>1/2</sub> and Fe 2p<sub>3/2</sub> at 711.3 and 724.5 eV clearly indicates the existence of Fe<sup>2+</sup>, which is well in accordance with the literature [1]. Meanwhile, the peak at 54.57 eV and 58 eV in Fig.S7b can be ascribed to Se 3d<sub>5/2</sub> and Se 3d<sub>3/2</sub>, indicating the existence of Se<sup>2-</sup> species in the FeSe<sub>2</sub> [1-3]. From these data, it is clear that the FeSe<sub>2</sub> after loading on support appeared with binding energy values almost the same as those values of the neat FeSe<sub>2</sub>.

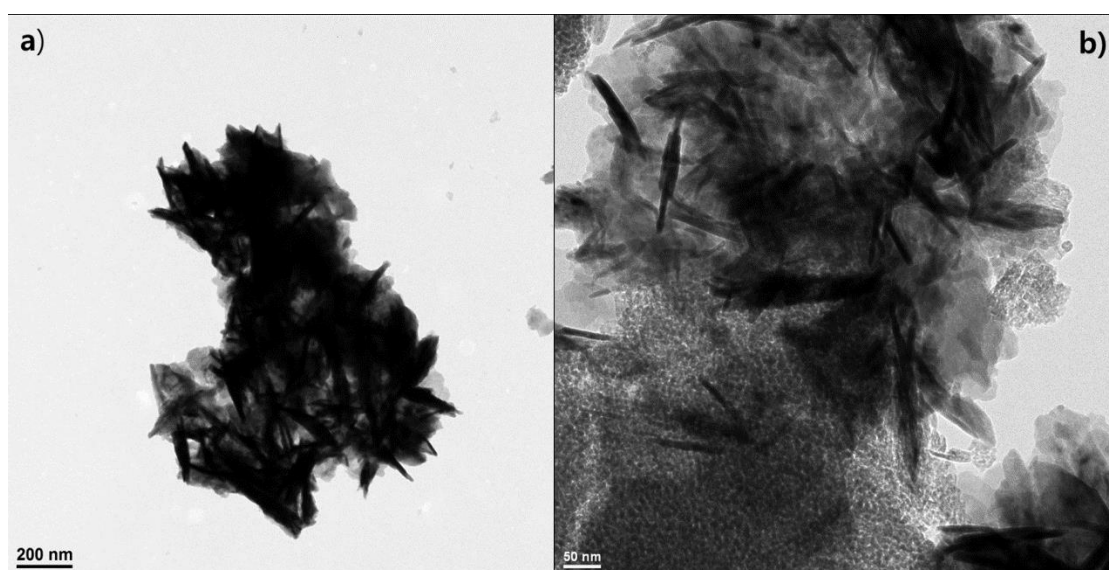

**Figure S.9** High resolution TEM images of (a) neat FeSe<sub>2</sub> prepared with the presence of pyridine, and (b)

FeSe<sub>2</sub>/γ-Al<sub>2</sub>O<sub>3</sub> prepared with the presence of pyridine.

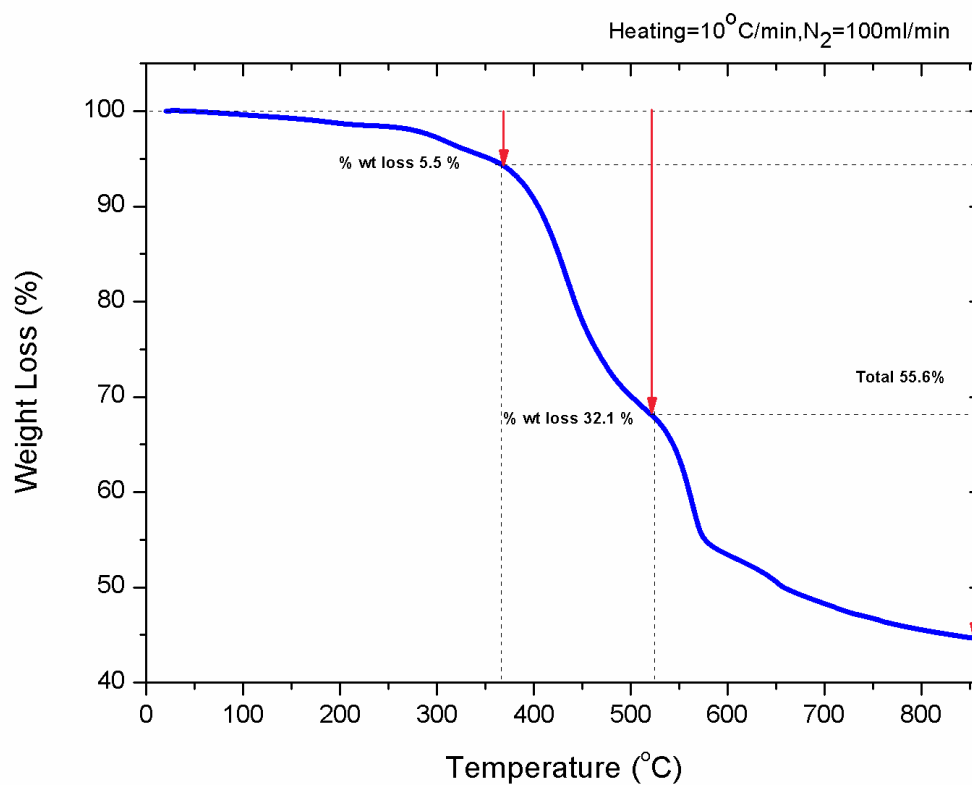

**Figure S. 10** Thermogravimetric analysis (TGA) of FeSe<sub>2</sub>.

Thermal stability of neat FeSe<sub>2</sub> as prepared catalyst is confirmed by TGA. The fig S.9 shows that the major mass loss started from 380 to 520 °C is due to the decomposition of FeSe<sub>2</sub>. It is indicating that FeSe<sub>2</sub> have high thermal stability up to 380 °C.

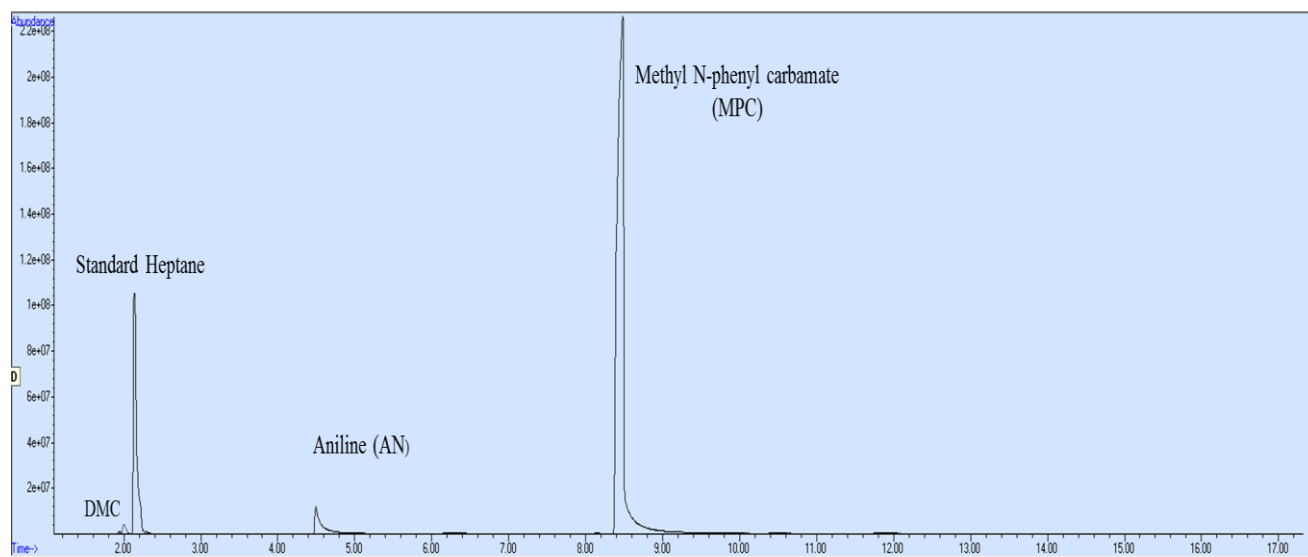

**Figure S. 11** GC-MS of the filtrate obtained in the reductive carbonylation reaction using FeSe<sub>2</sub> as catalyst with molar ratio NB/FeSe<sub>2</sub> = 1,

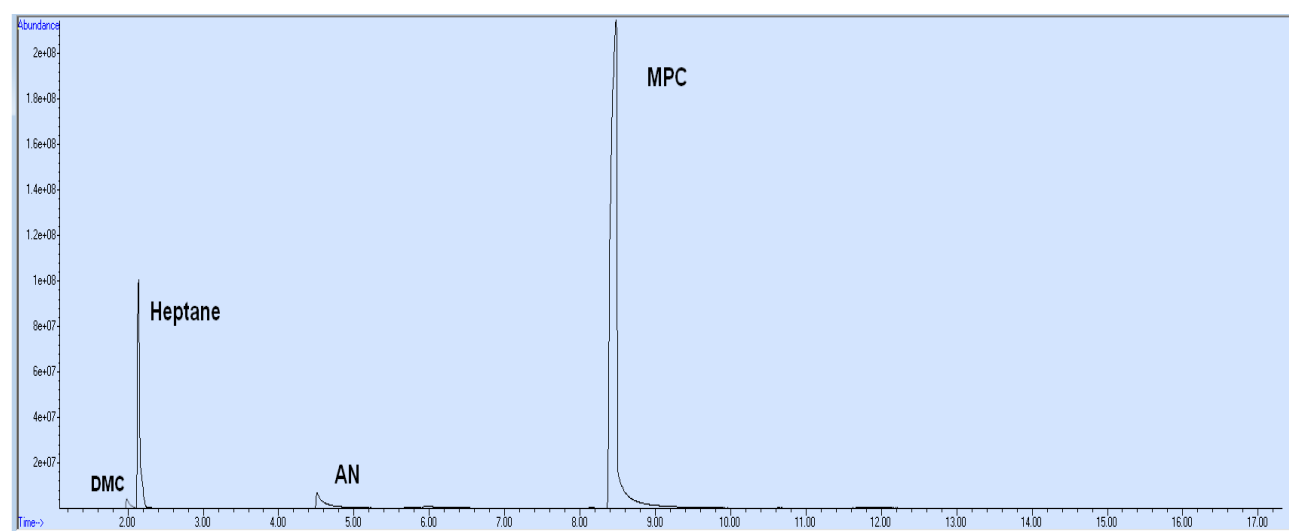

**Figure S. 12** GC-MS of the filtrate obtained in the reductive carbonylation reaction using FeSe<sub>2</sub> as catalyst with molar ratio NB/FeSe<sub>2</sub> = 4

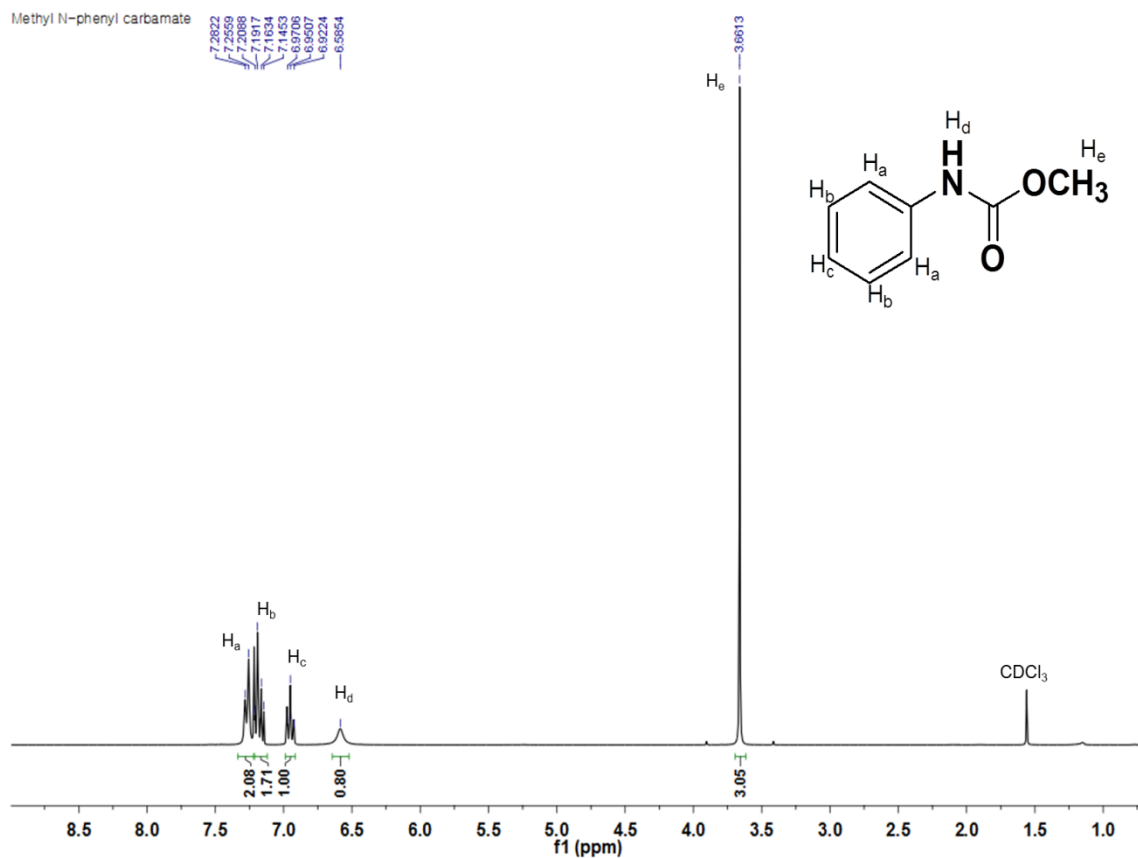

**Figure S. 13** <sup>1</sup>H-NMR spectra of Methyl N-phenyl carbamate (MPC) product obtained from the reductive carbonylation rxn. <sup>1</sup>H NMR (300 MHz, CDCl<sub>3</sub>,  $\delta$  3.66 (s, 3H, OCH<sub>3</sub>); 6.59 (s, 1H, NH); 6.95 (t, 1H, ArH); 7.17(m, 2H, ArH); 7.27 (d, 2H, ArH).

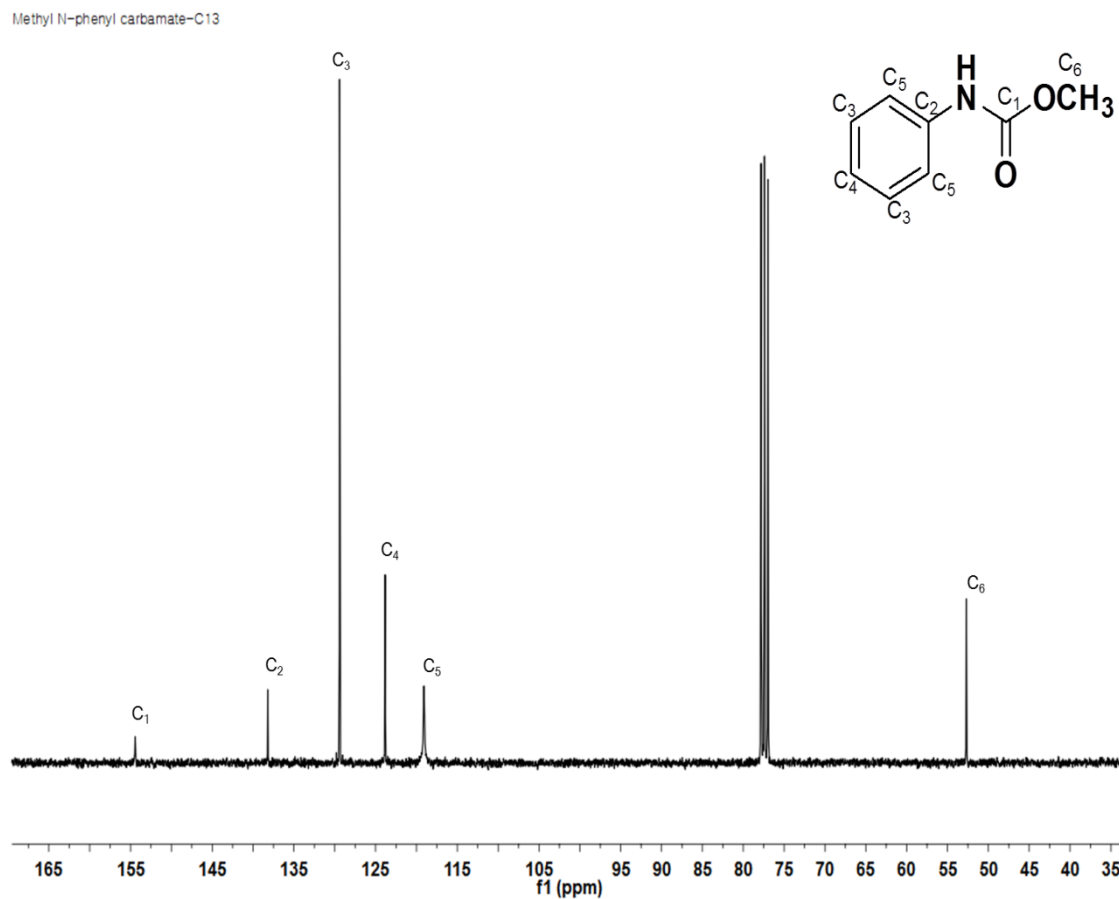

**Figure S. 14**  $^{13}\text{C}$ -NMR of MPC product obtained from the reductive carbonylation reaction of nitrobenzene.  $^{13}\text{C}$  NMR (300 MHz,  $\text{CDCl}_3$ ,  $\delta$  52.5 ( $\text{OCH}_3$ ); 118.85 ( $\text{C}_6\text{H}_5$ -); 123.6 ( $\text{C}_6\text{H}_5$ -); 129.1 ( $\text{C}_6\text{H}_5$ -); 137.9 ( $\text{C}_6\text{H}_5$ -); 154.19 ( $\text{C}_6\text{H}_5$ -).

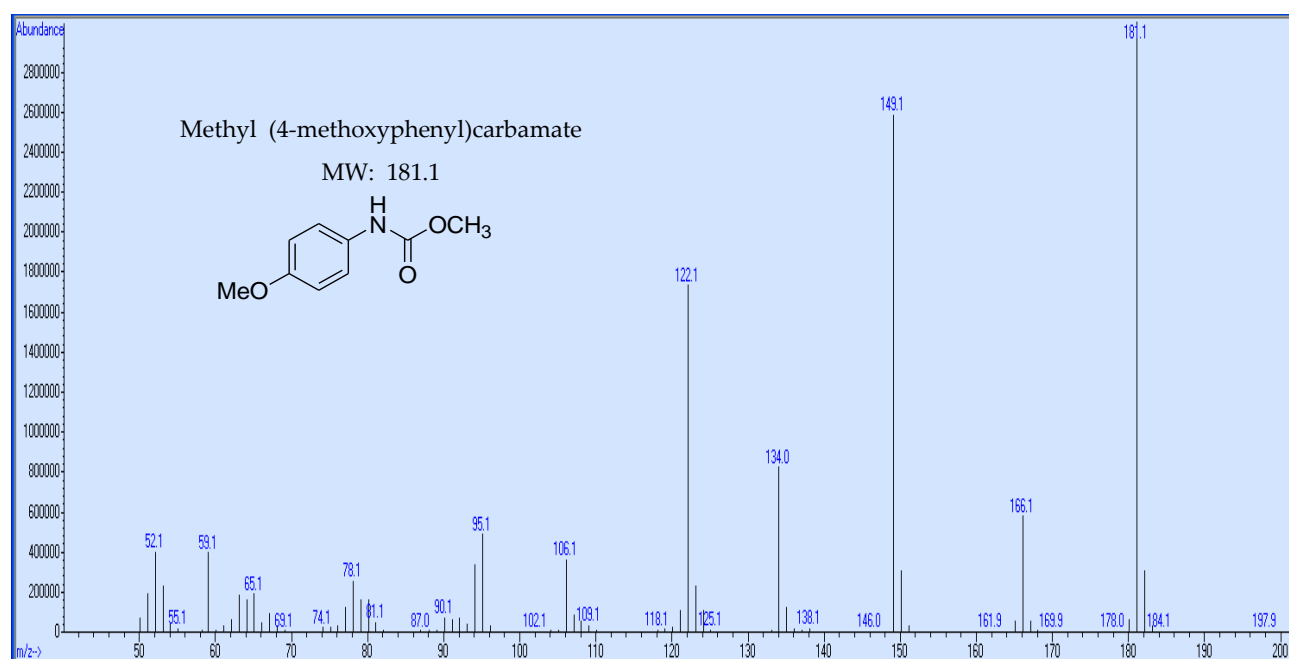

**Figure S. 15** GC-MS of Methyl (4-methoxyphenyl) carbamate

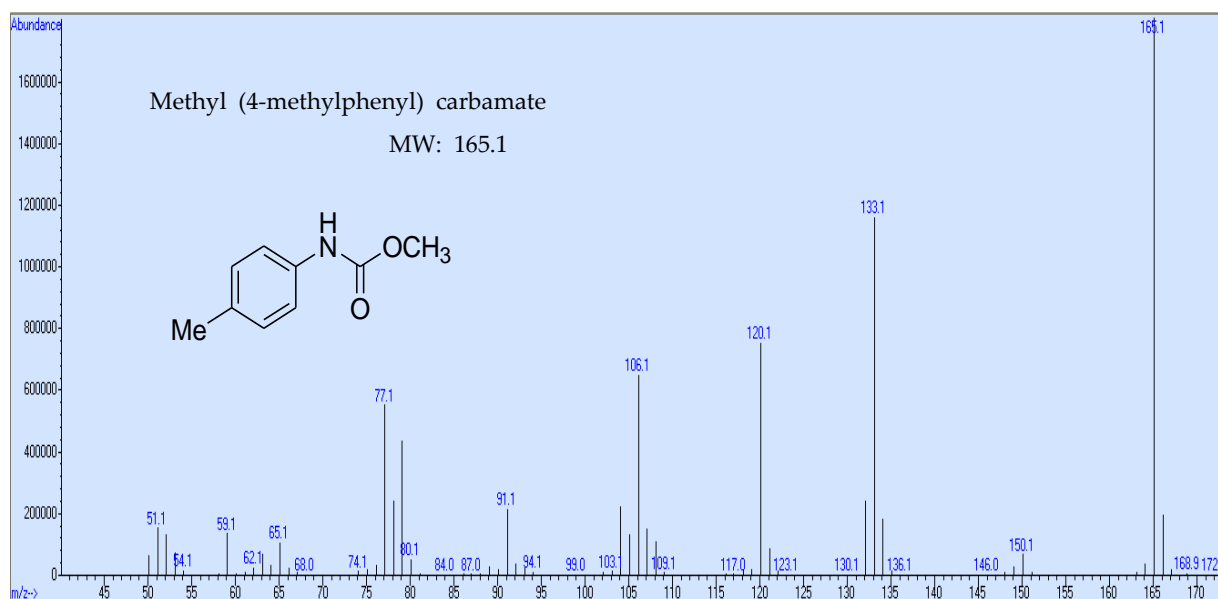

Figure S. 16 GC-MS of Methyl (4-methylphenyl) carbamate

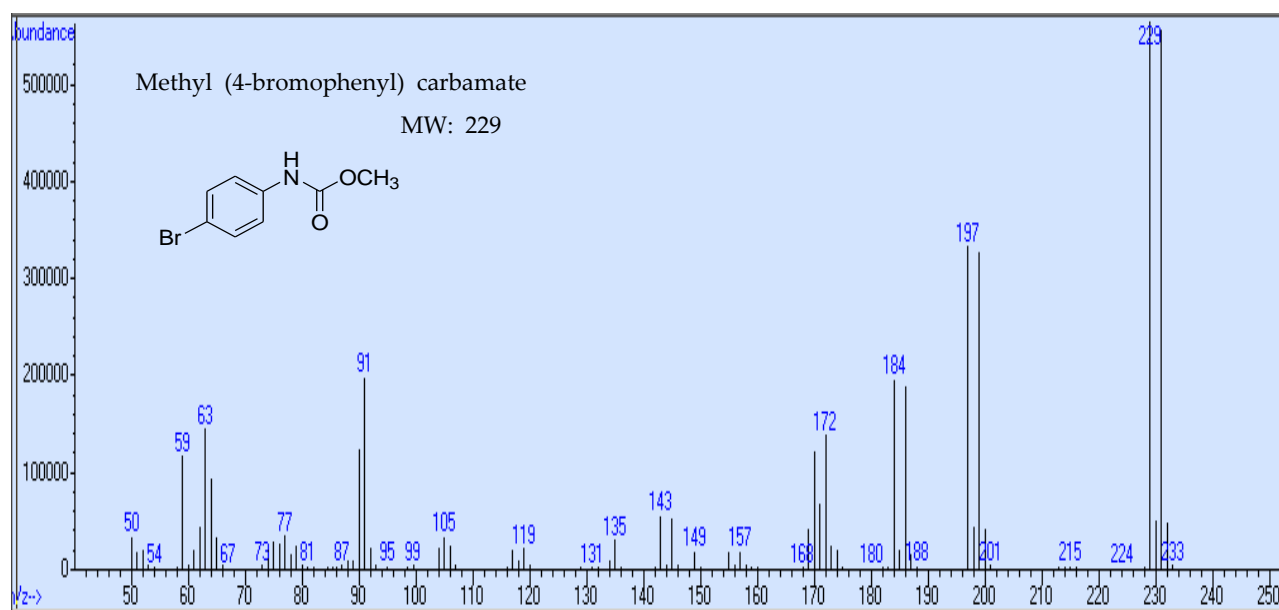

Figure S. 17 GC-MS of Methyl (4-bromophenyl) carbamate

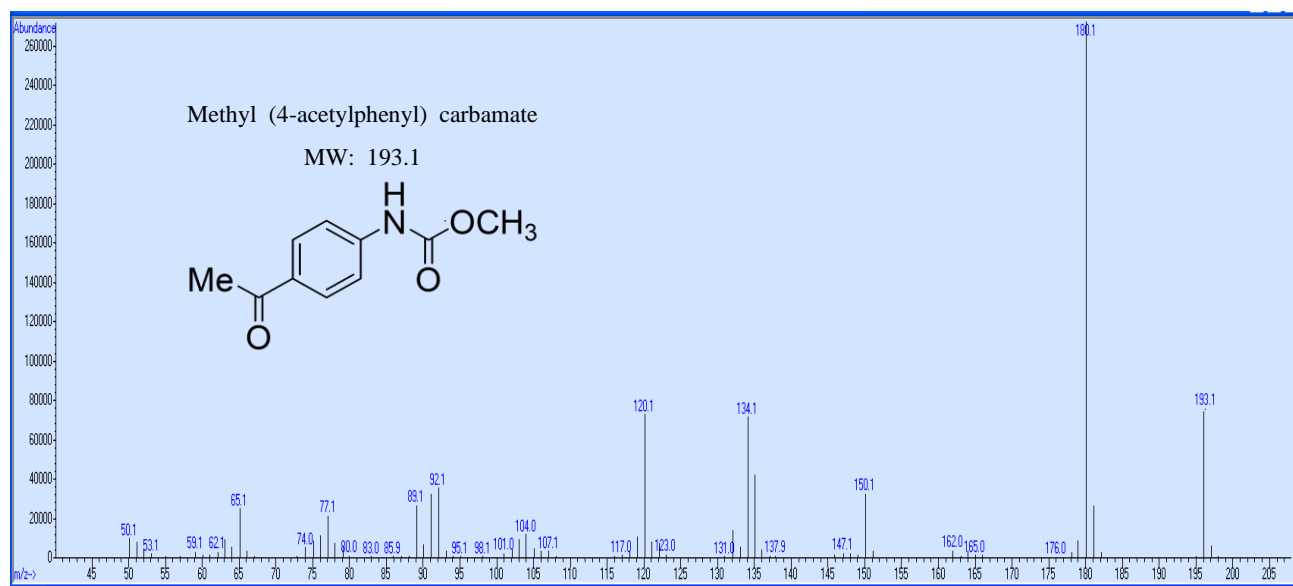

Figure S. 18 GC-MS of Methyl (4-acetylphenyl) carbamate

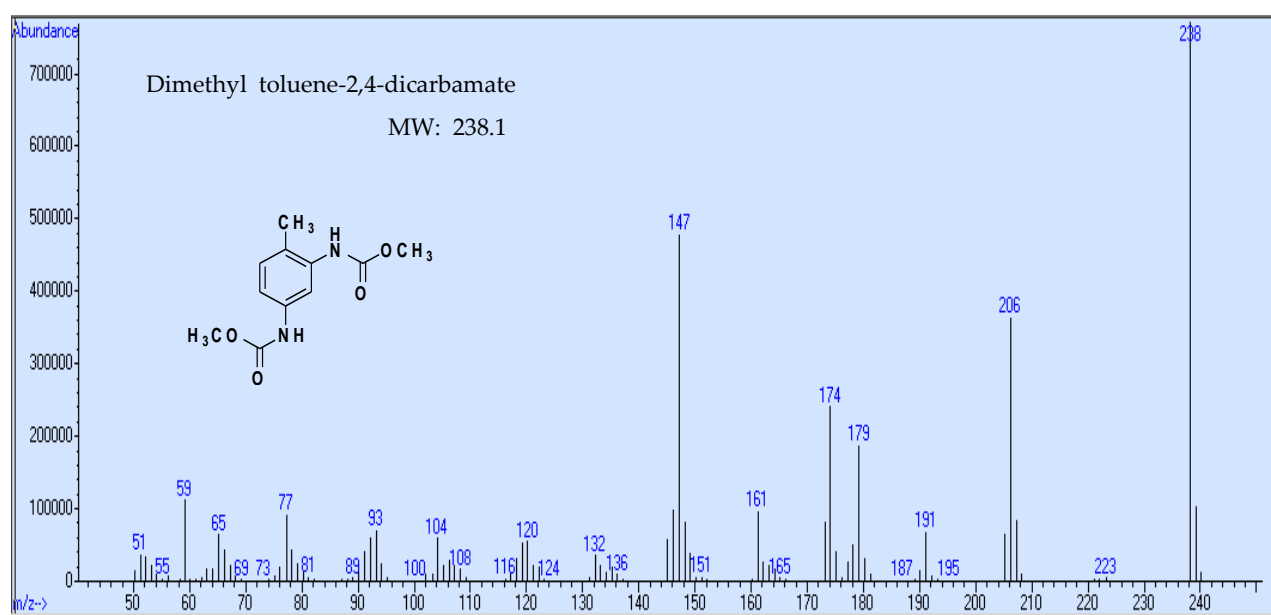

Figure S. 19 GC-MS of Dimethyl toluene-2,4-dicarbamate

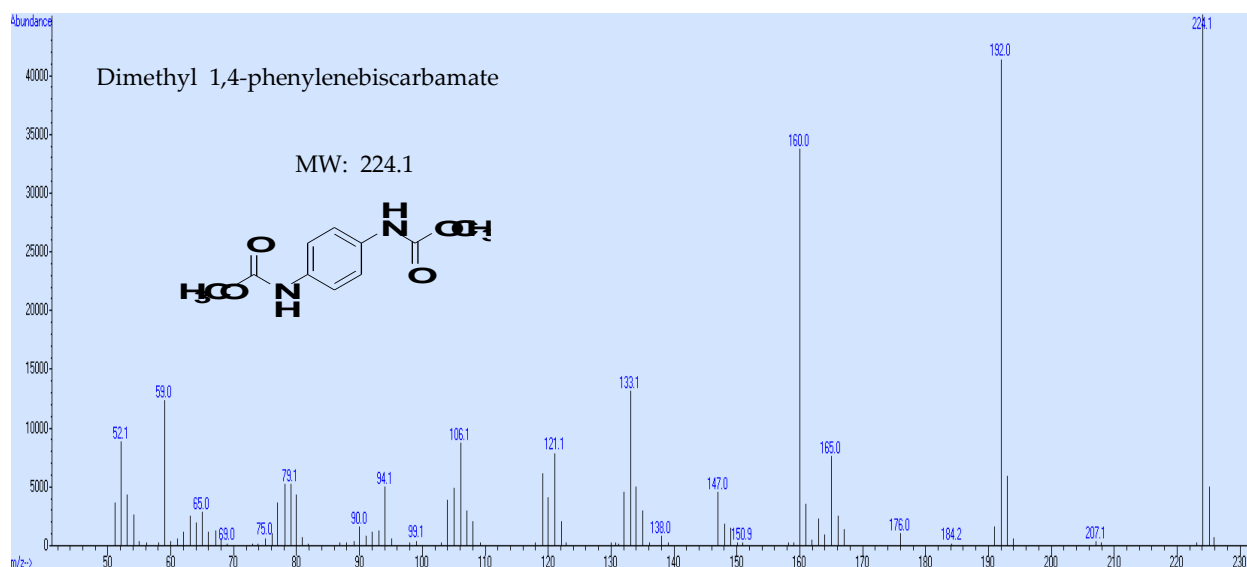

Figure S. 20 GC-MS of dimethyl 1,4-phenylenebiscarbamate

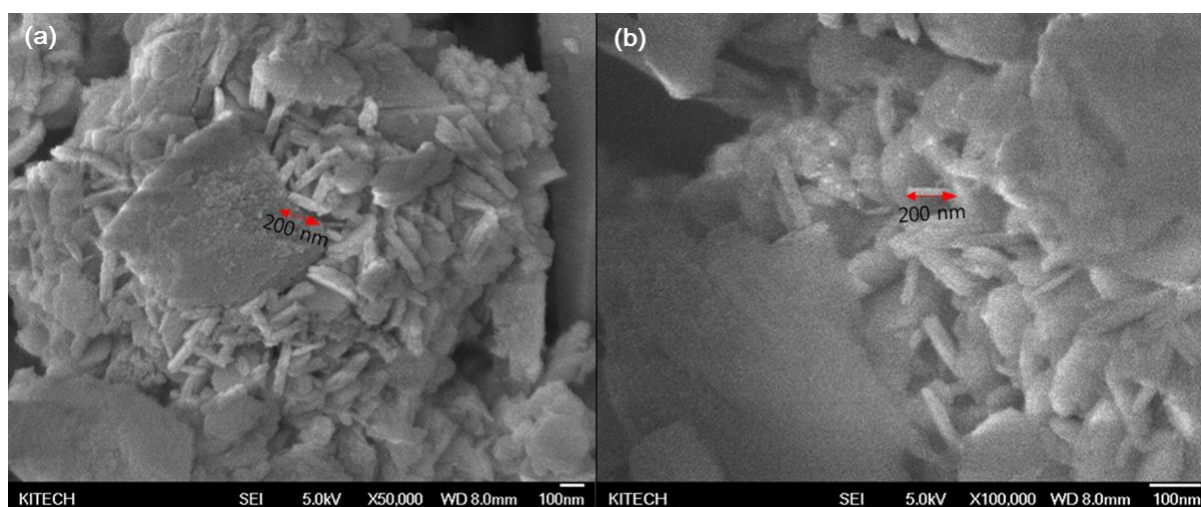

Figure S. 21 Scanning electron microscopy (SEM) figures of (a) fresh  $\text{FeSe}_2/\gamma\text{-Al}_2\text{O}_3$  catalyst, and (b) spent  $\text{FeSe}_2/\gamma\text{-Al}_2\text{O}_3$

As shown in Fig. S20, SEM analysis was conducted to compare the morphology of the fresh and reused catalysts. There are no noticeable differences between the fresh catalyst and the reused one. It indicates the high recyclability of the catalyst.



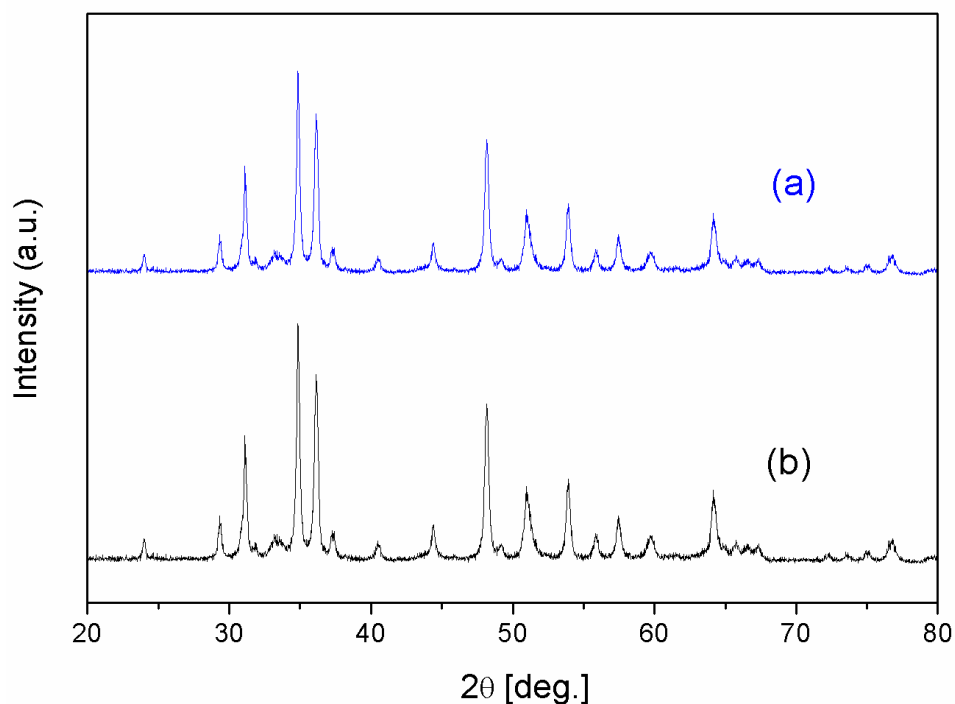

**Figure S. 22** X-ray diffraction spectra of (a) fresh catalyst FeSe<sub>2</sub>, (b) recovered FeSe<sub>2</sub> after 5<sup>th</sup> recycling in the reductive carbonylation reaction of NB.

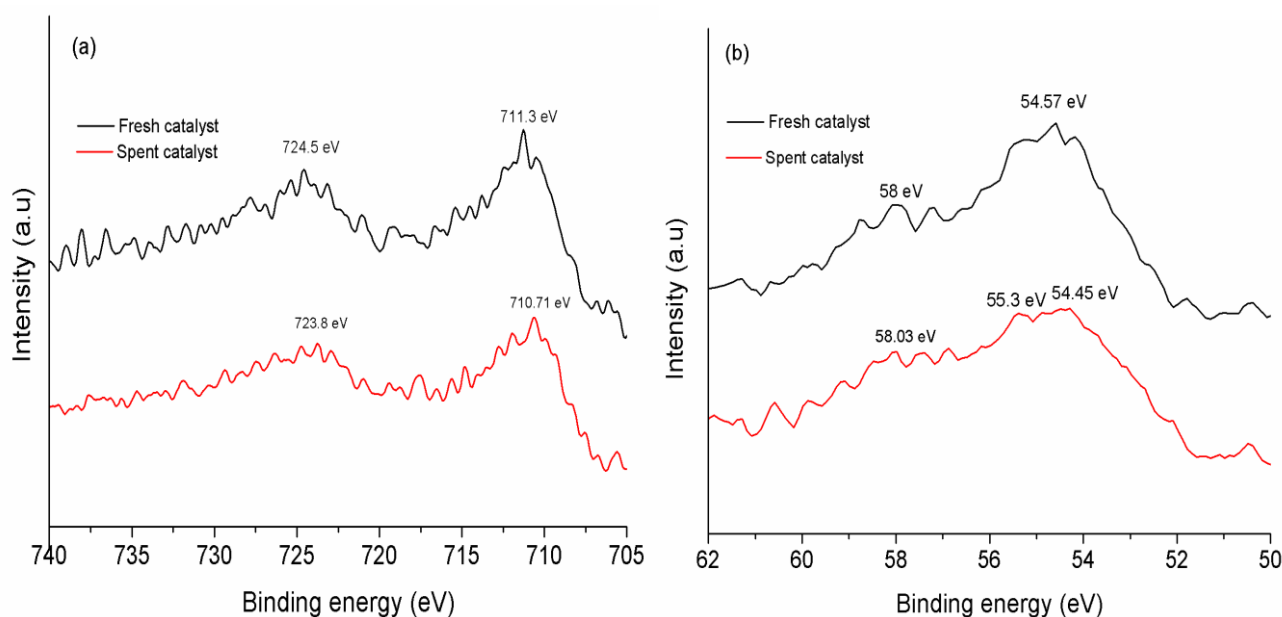

**Figure S. 23** XPS of the fresh and spent FeSe<sub>2</sub>/  $\gamma$ -Al<sub>2</sub>O<sub>3</sub> in the region of (a) Fe 3p; (b) Se 3d.

XPS results of fresh and spent FeSe<sub>2</sub>/  $\gamma$ -Al<sub>2</sub>O<sub>3</sub> over the spectra regions of Fe 3p and Se 3d were showed in Fig. S21. In the Fe 3p region of fresh and spent catalysts, there was no difference in the binding energy. In the Se 3d region, the spent catalyst shows the shifting of Se 3d peak from 54.45 eV to 55.3 eV, it is indicating the partial formation of Se (0) species during the reductive carbonylation process. These results are in good agreement with the presence of carbonyl selenide (Se-CO) species, which was shown in FT-IR result.

**References:**

- [1] Q. Zheng, X. Cheng, H. Li, Microwave Synthesis of High Activity FeSe<sub>2</sub>/C Catalyst toward Oxygen Reduction Reaction, *Catalysts*. 5 (2015) 1079-1091. <https://doi.org/10.3390/catal5031079>
- [2] M. Shenasa, S. Sainkar, D. Lichtman, XPS study of some selected selenium compounds, *J electron spectrosc.* 40 (1986) 329-337. [https://doi.org/10.1016/0368-2048\(86\)80043-3](https://doi.org/10.1016/0368-2048(86)80043-3)
- [3] J. Jia, Q. Zhang, Z. Li, X. Hu, E. Liu, J. Fan, Lateral heterojunctions within ultrathin FeS–FeSe<sub>2</sub> nanosheet semiconductors for photocatalytic hydrogen evolution, *Journal of Materials Chemistry A*. 7 (2019) 3828-3841. <https://doi.org/10.1039/c8ta11456k>

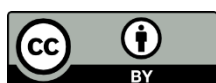

© 2020 by the authors. Submitted for possible open access publication under the terms and conditions of the Creative Commons Attribution (CC BY) license (<http://creativecommons.org/licenses/by/4.0/>).
